# Supplementary material
Source: PubMed Central journal article supplement (PMC4872028)
Supplement: supp_JCO.2015.63.0830_DS_2015.630830.pdf [file supp_JCO.2015.63.0830_DS_2015.630830.pdf]

**Symptom monitoring with patient-reported outcomes  
during routine cancer treatment: A randomized  
controlled trial**

**Basch et al**

## **ONLINE ONLY SUPPLEMENT**

### **Symptom monitoring with patient-reported outcomes during routine cancer treatment: A randomized controlled trial**

Ethan Basch, MD (1,2); Allison M. Deal, MS (2); Mark G. Kris, MD (1); Howard I. Scher, MD (1); Clifford Hudis, MD (1); Paul Sabbatini, MD (1); Lauren Rogak, MA (1), Antonia V. Bennett, PhD (2); Amylou C. Dueck, PhD (3), Thomas M. Atkinson, PhD (1); Joanne F. Chou, MS (1); Dorothy Dulko, PhD (1), Laura Sit, MS (1), Allison Barz, MD (4), Paul Novotny, MS (5), Michael Fruscione, MD (1); Jeff Sloan, PhD (5); Deborah Schrag, MD (1,6)

- 1) Memorial Sloan Kettering Cancer Center, New York, NY
- 2) Lineberger Comprehensive Cancer Center, University of North Carolina, Chapel Hill, NC
- 3) Mayo Clinic, Scottsdale, AZ
- 4) Children's Hospital of Philadelphia, Philadelphia, PA
- 5) Mayo Clinic, Rochester, MN
- 6) Dana-Farber/Harvard Cancer Center, Boston, MA

#### **APPENDIX CONTENTS:**

- **eTable 1.** Sensitivity analyses for health-related quality of life measurement – Method 1.
- **eTable 2.** Sensitivity analyses for health-related quality of life measurement – Method 2.
- **eTable 3.** Sensitivity analyses for health-related quality of life measurement – Method 3.
- **eTable 4.** Sensitivity analyses for health-related quality of life measurement – Method 4.
- **eTable 5.** Sensitivity analyses for health-related quality of life measurement – Method 5.
- **eTable 6.** Sensitivity analyses for health-related quality of life measurement – Method 6.
- **eFigure 1.** Proportion of patients with various health-related quality of life score changes at six months compared to baseline.
- **eFigure 2.** Cumulative incidence of hospitalization.
- **eFigure 3.** Patient adherence with symptom self-reporting at consecutive clinic visits.

**eTable 1. Sensitivity analyses for health-related quality of life measurement – Method 1**

**Method 1:** Last observation carried forward excluding participants with only baseline observations (primary analysis reported in body of manuscript)

| Cohort                 | N   | Timepoint | Mean HRQL Intervention Arm | Mean HRQL Usual Care Arm | P-value for between-arm comparison* (univariable) | P-value for between-arm comparison* (multivariable) |
|------------------------|-----|-----------|----------------------------|--------------------------|---------------------------------------------------|-----------------------------------------------------|
| All patients           | 457 | Baseline  | 86.2                       | 86.6                     | <0.001                                            | <0.001                                              |
|                        |     | 6 months  | 84.8                       | 79.5                     |                                                   |                                                     |
| Subgroup analysis      |     |           |                            |                          |                                                   |                                                     |
| Computer-experienced   | 341 | Baseline  | 87.3                       | 86.5                     | <0.001                                            | <0.001                                              |
|                        |     | 6 months  | 86.1                       | 79.7                     |                                                   |                                                     |
| Computer-inexperienced | 116 | Baseline  | 83.6                       | 86.9                     | 0.06                                              | 0.11                                                |
|                        |     | 6 months  | 81.8                       | 78.6                     |                                                   |                                                     |

\* Comparison of changes from baseline between arms. Multivariable analysis includes age, sex, cancer type, race, and education level. Multivariable analysis for “all patients” includes subgroup assignment (computer experience).

**eTable 2. Sensitivity analyses for health-related quality of life measurement – Method 2**

**Method 2:** Last observation carried forward including baseline observations carried forward when only baseline observations available (e.g., for participants who discontinued cancer treatment or died prior to reporting any HRQL score)

| Cohort                 | N                | Timepoint | Mean HRQL Intervention Arm | Mean HRQL Usual Care Arm | P-value for between-arm comparison (univariable)* | P-value for between-arm comparison (multivariable)* |
|------------------------|------------------|-----------|----------------------------|--------------------------|---------------------------------------------------|-----------------------------------------------------|
| All patients           | 757              | Baseline  | 84.7                       | 84.4                     | <0.001                                            | <0.001                                              |
|                        |                  | 6 months  | 83.8                       | 80.5                     |                                                   |                                                     |
| Subgroup analysis      |                  |           |                            |                          |                                                   |                                                     |
| Computer-experienced   | 537 <sup>§</sup> | Baseline  | 86.2                       | 84.5                     | 0.002                                             | 0.002                                               |
|                        |                  | 6 months  | 85.3                       | 80.5                     |                                                   |                                                     |
| Computer-inexperienced | 220 <sup>§</sup> | Baseline  | 82.0                       | 84.2                     | 0.10                                              | 0.12                                                |
|                        |                  | 6 months  | 81.0                       | 80.3                     |                                                   |                                                     |

\* Comparison of changes from baseline between arms. Multivariable analysis includes age, sex, cancer type, race, and education level. Multivariable analysis for “all patients” includes subgroup assignment (computer experience).

<sup>§</sup> 2 participants in computer-experienced cohort and 7 patients in computer-inexperienced cohort excluded due to missing baseline HRQL questionnaire.

**eTable 3. Sensitivity analyses for health-related quality of life measurement – Method 3**

**Method 3:** No observations carried forward (i.e., only includes HRQL reported at 6 months)

| Cohort                 | N   | Timepoint | Mean HRQL Intervention Arm | Mean HRQL Usual Care Arm | P-value for between-arm comparison (univariable)* | P-value for between-arm comparison (multivariable)* |
|------------------------|-----|-----------|----------------------------|--------------------------|---------------------------------------------------|-----------------------------------------------------|
| All patients           | 203 | Baseline  | 86.2                       | 86.6                     | 0.02                                              | 0.05                                                |
|                        |     | 6 months  | 83.9                       | 79.1                     |                                                   |                                                     |
| Subgroup analysis      |     |           |                            |                          |                                                   |                                                     |
| Computer-experienced   | 143 | Baseline  | 87.3                       | 86.6                     | 0.05                                              | 0.13                                                |
|                        |     | 6 months  | 84.9                       | 79.3                     |                                                   |                                                     |
| Computer-inexperienced | 60  | Baseline  | 84.3                       | 86.5                     | 0.25                                              | 0.21                                                |
|                        |     | 6 months  | 82.1                       | 78.3                     |                                                   |                                                     |

\*Comparison of changes from baseline between arms. Multivariable analysis includes age, sex, cancer type, race, and education level. Multivariable analysis for “all patients” includes subgroup assignment (computer experience).

**eTable 4. Sensitivity analyses for health-related quality of life measurement – Method 4**

Method 4: Minimum observation value carried forward

| Cohort                 | N   | Timepoint | Mean HRQL Intervention Arm | Mean HRQL Usual Care Arm | P-value for between-arm comparison (univariable)* | P-value for between-arm comparison (multivariable)* |
|------------------------|-----|-----------|----------------------------|--------------------------|---------------------------------------------------|-----------------------------------------------------|
| All patients           | 457 | Baseline  | 86.2                       | 86.6                     | <0.001                                            | <0.001                                              |
|                        |     | 6 months  | 83.8                       | 78.6                     |                                                   |                                                     |
| Subgroup analysis      |     |           |                            |                          |                                                   |                                                     |
| Computer-experienced   | 341 | Baseline  | 87.3                       | 86.5                     | <0.001                                            | <0.001                                              |
|                        |     | 6 months  | 85.2                       | 78.7                     |                                                   |                                                     |
| Computer-inexperienced | 116 | Baseline  | 83.6                       | 86.9                     | 0.10                                              | 0.17                                                |
|                        |     | 6 months  | 80.5                       | 78.2                     |                                                   |                                                     |

\*Comparison of changes from baseline between arms. Multivariable analysis includes age, sex, cancer type, race, and education level. Multivariable analysis for “all patients” includes subgroup assignment (computer experience).

**eTable 5. Sensitivity analyses for health-related quality of life measurement – Method 5**

Method 5: Average observation value carried forward

| Cohort                 | N   | Timepoint | Mean HRQL Intervention Arm | Mean HRQL Usual Care Arm | P-value for between-arm comparison (univariable)* | P-value for between-arm comparison (multivariable)* |
|------------------------|-----|-----------|----------------------------|--------------------------|---------------------------------------------------|-----------------------------------------------------|
| All patients           | 457 | Baseline  | 86.2                       | 86.6                     | <0.001                                            | <0.001                                              |
|                        |     | 6 months  | 84.7                       | 79.8                     |                                                   |                                                     |
| Subgroup analysis      |     |           |                            |                          |                                                   |                                                     |
| Computer-experienced   | 341 | Baseline  | 87.3                       | 86.5                     | 0.001                                             | <0.001                                              |
|                        |     | 6 months  | 85.9                       | 80.0                     |                                                   |                                                     |
| Computer-inexperienced | 116 | Baseline  | 83.6                       | 86.9                     | 0.05                                              | 0.09                                                |
|                        |     | 6 months  | 81.9                       | 78.5                     |                                                   |                                                     |

\*Comparison of changes from baseline between arms. Multivariable analysis includes age, sex, cancer type, race, and education level. Multivariable analysis for “all patients” includes subgroup assignment (computer experience).

**eTable 6. Sensitivity analyses for health-related quality of life measurement – Method 6**

Method 6: Last observation carried forward excluding participants with only baseline observations including the assignment of EQ-5D value of 0 if death occurred prior to 6 months

| Cohort                 | N   | Timepoint | Mean HRQL Intervention Arm | Mean HRQL Usual Care Arm | P-value for between-arm comparison (univariable)* | P-value for between-arm comparison (multivariable)* |
|------------------------|-----|-----------|----------------------------|--------------------------|---------------------------------------------------|-----------------------------------------------------|
| All patients           | 457 | Baseline  | 86.2                       | 86.6                     | 0.002                                             | 0.002                                               |
|                        |     | 6 months  | 82.1                       | 75.9                     |                                                   |                                                     |
| Subgroup analysis      |     |           |                            |                          |                                                   |                                                     |
| Computer-experienced   | 341 | Baseline  | 87.3                       | 86.5                     | 0.006                                             | 0.009                                               |
|                        |     | 6 months  | 83.3                       | 75.7                     |                                                   |                                                     |
| Computer-inexperienced | 116 | Baseline  | 83.6                       | 86.9                     | 0.17                                              | 0.21                                                |
|                        |     | 6 months  | 79.3                       | 76.4                     |                                                   |                                                     |

\*Comparison of changes from baseline between arms. Multivariable analysis includes age, sex, cancer type, race, and education level. Multivariable analysis for “all patients” includes subgroup assignment (computer experience).

**eFigure 1. Proportion of patients with various quality of life score changes at six months compared to baseline.** Patients are grouped by 10-point increments on the 100-point scale of the EuroQol EQ-5D questionnaire.

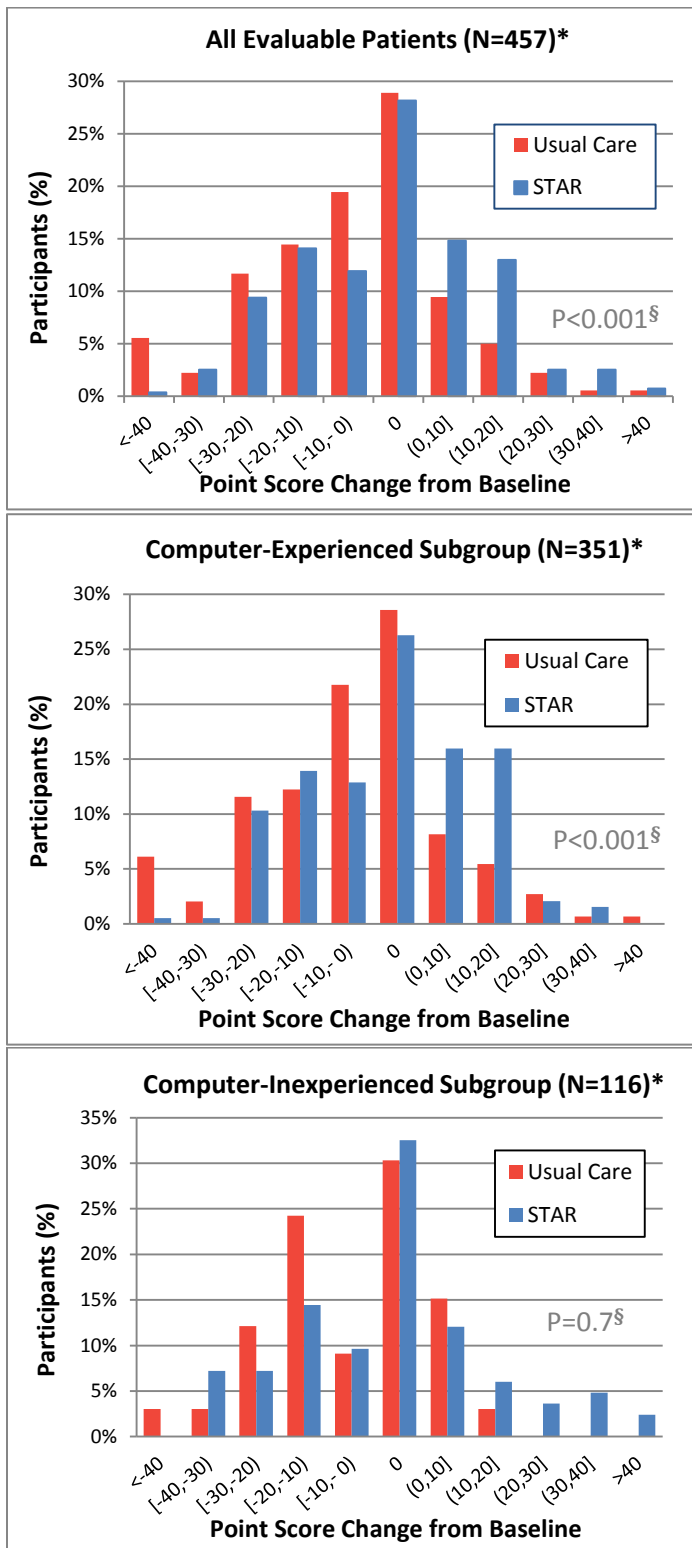

Abbreviations: STAR, Symptom Tracking and Reporting web-based self-reporting system (study intervention).

\* Patients without post-baseline EQ-5D scores were not included in the primary HRQL analysis, but were included in a sensitivity analysis with similar results (Online-only Appendix).

§ P-values calculated using Fisher's Exact test comparing the two study arms based on the 11 categories.

**eFigure 2. Cumulative incidence of hospitalization**

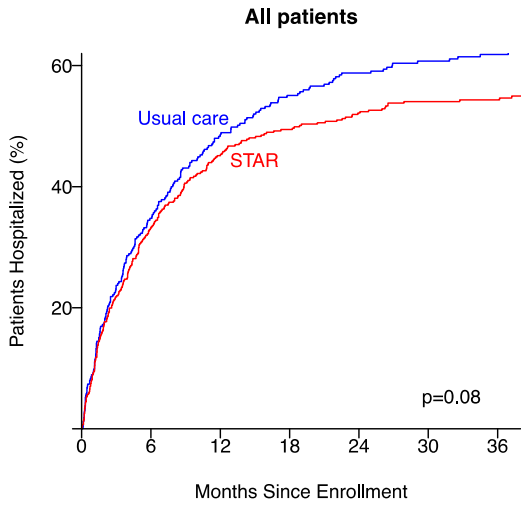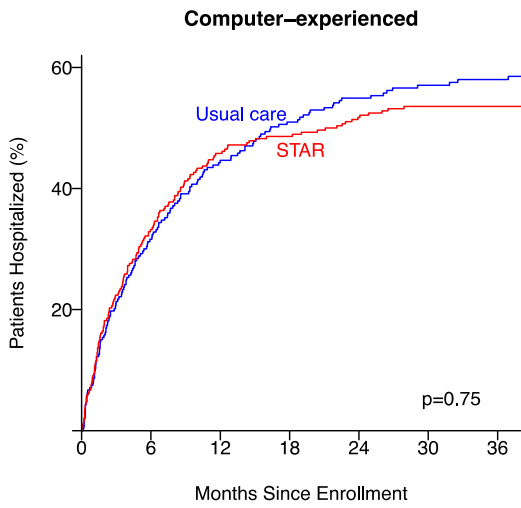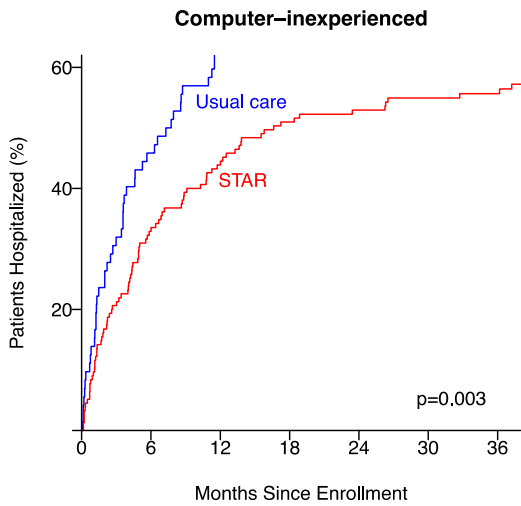

| No. At Risk       | 0   | 6   | 12  | 18  | 24  | 30  | 36  |
|-------------------|-----|-----|-----|-----|-----|-----|-----|
| <b>Total</b>      | 766 | 492 | 370 | 309 | 266 | 215 | 171 |
| <b>STAR</b>       | 441 | 291 | 222 | 187 | 161 | 131 | 102 |
| <b>Usual Care</b> | 325 | 201 | 148 | 122 | 105 | 84  | 69  |

Abbreviation: STAR, Symptom Tracking and Reporting web-based self-reporting system (study intervention).

**eFigure 3. Patient adherence with symptom self-reporting at consecutive clinic visits**

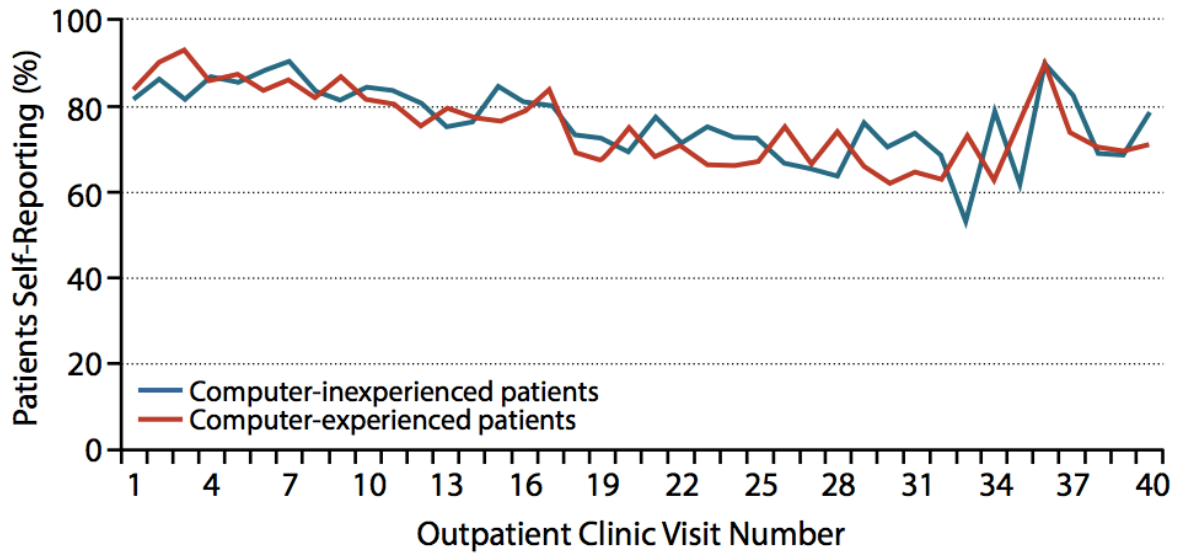

Data are shown through the 40th visit, after which point fewer than 5% of participants remained enrolled in the trial.
